# Supplementary material for: Pulmonary exposure to carbonaceous nanomaterials and sperm quality
Source: PubMed Central journal article supplement (PMC5793436; doi:10.1186/s12989-018-0242-8), 2018-01-31

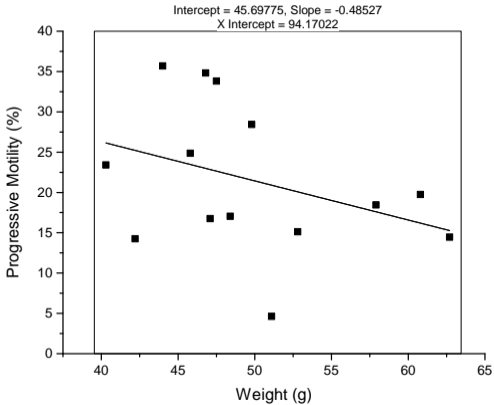

Supplement: 12989_2018_242_MOESM2_ESM.pdf [file 12989_2018_242_MOESM2_ESM.pdf]
